# Supplementary material for: Dopaminergic neurons write and update memories with cell-type-specific rules
Source: eLife journal article supplement (doi:10.7554/elife.16135), 2016-07-21
Supplement: supp [file elife_poa_e16135_Supplementary_File_1.pdf › elife_poa_e16135_Supplementary_File_1.pdf]

NOTES:

- FASTENING IS NOT SHOWN
- PARTS J005342 AND J001841 ARE 3D PRINTED IN HOUSE
- PART J002451 IS GLUED TO J002447

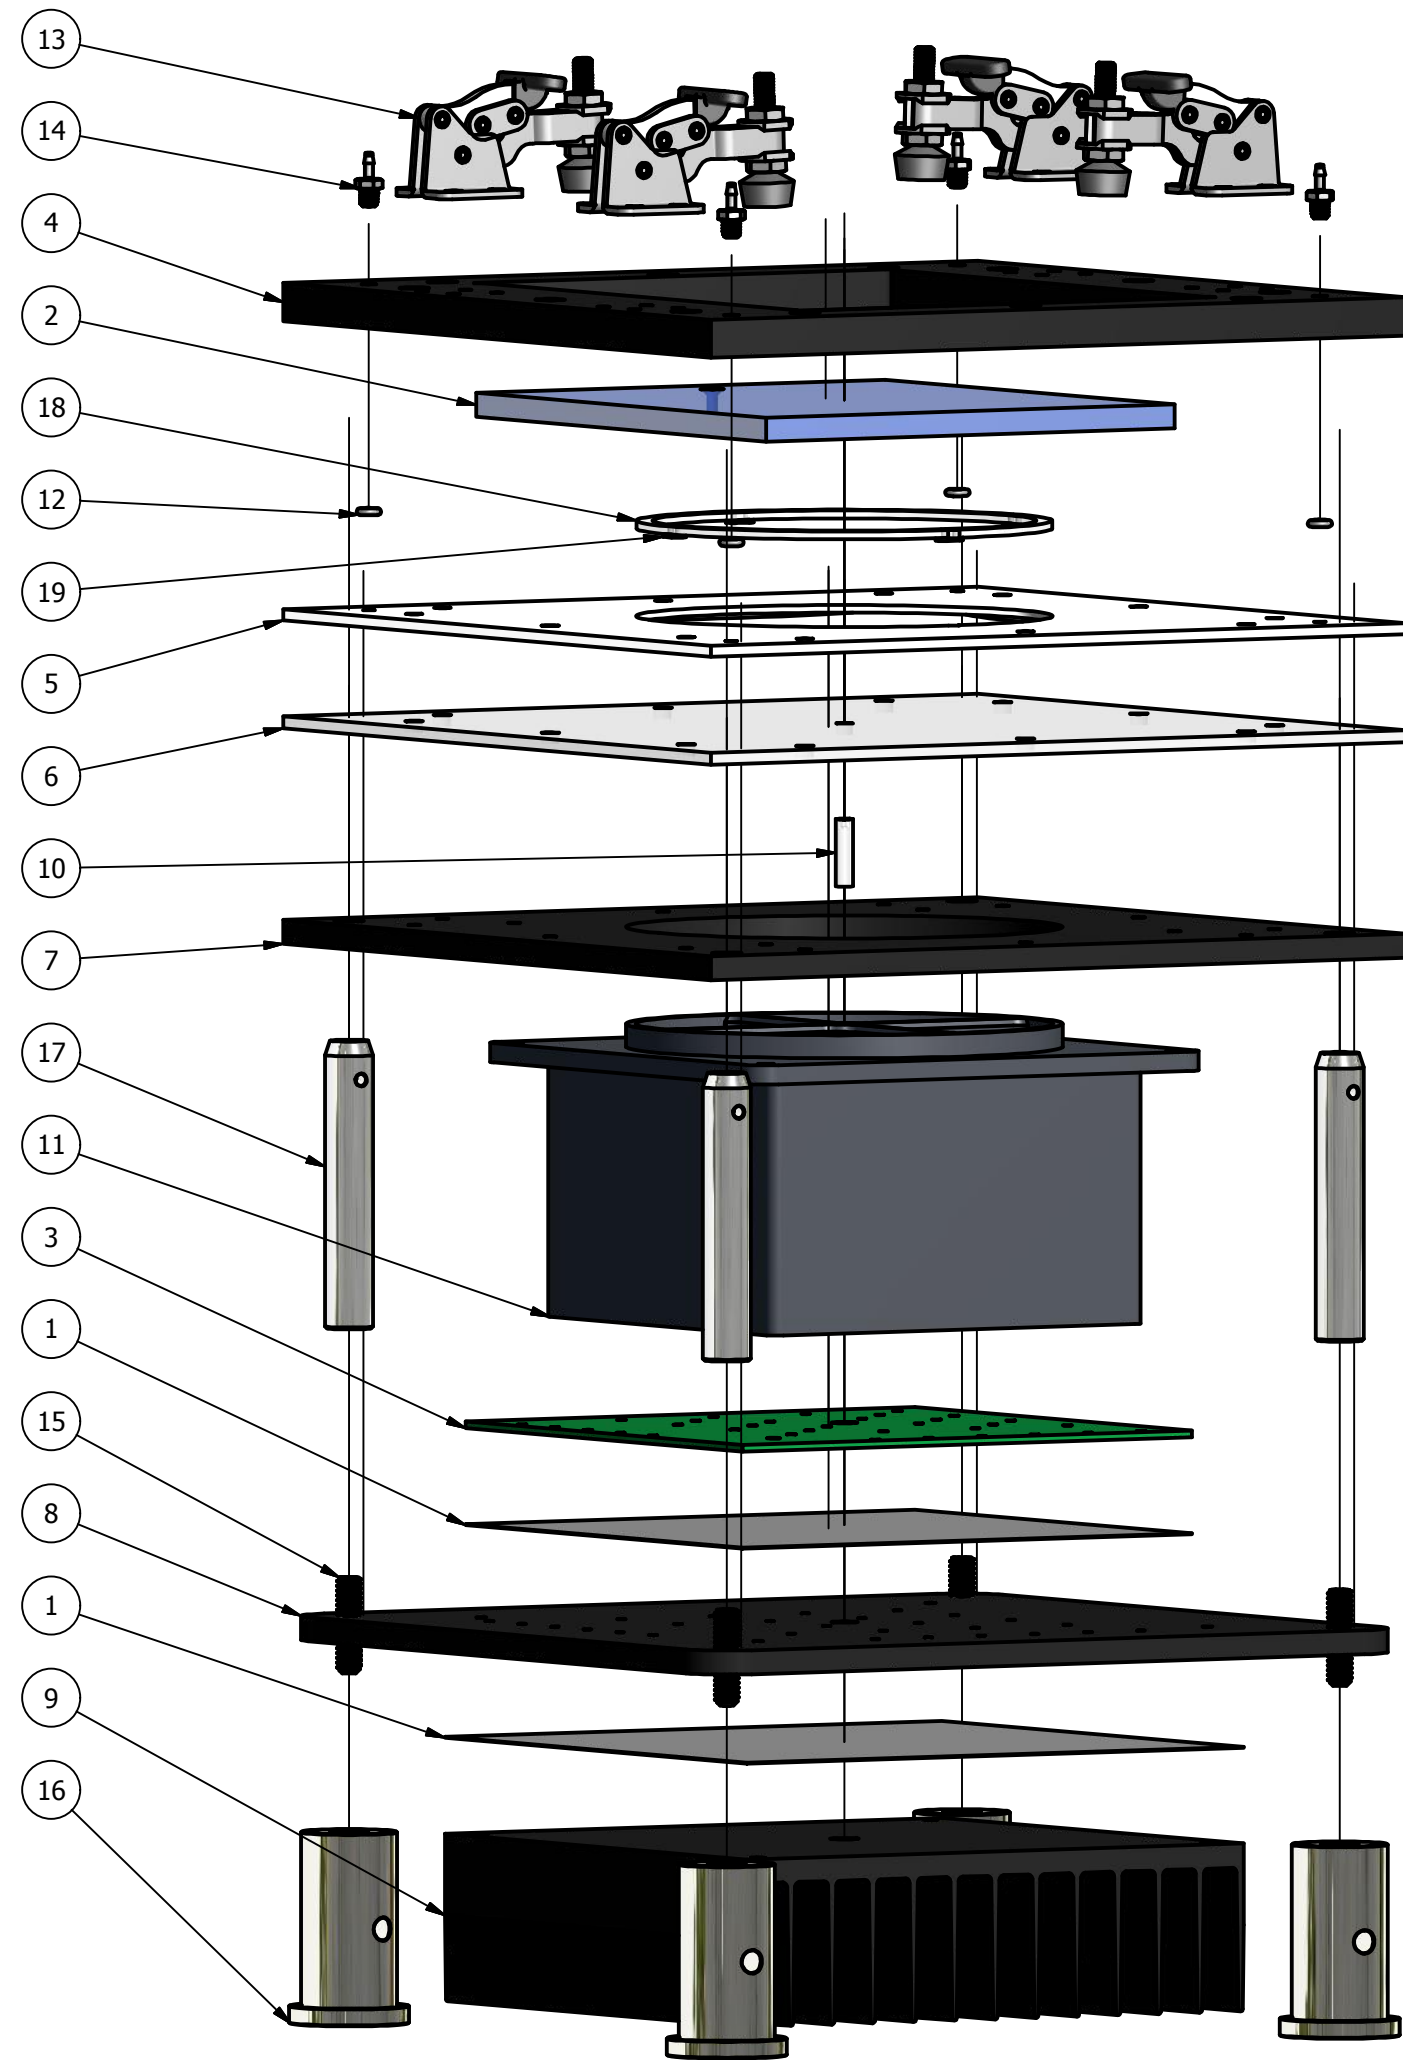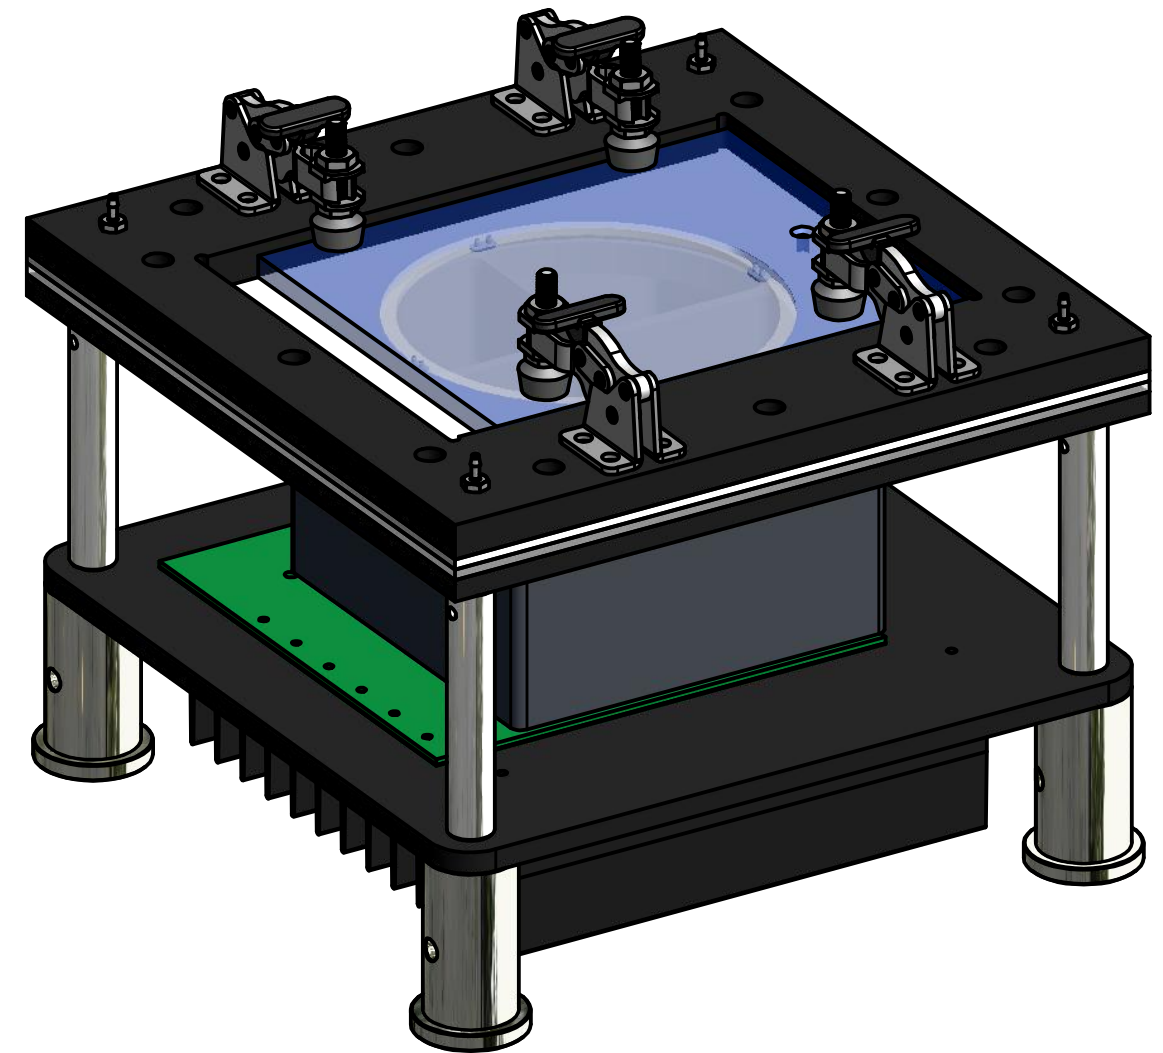

| ZONE | REV | REVISION HISTORY         |  | DATE       | APPROVED         |
|------|-----|--------------------------|--|------------|------------------|
|      | -   | DESCRIPTION              |  |            |                  |
|      | -   | INITIAL RELEASE          |  | 8/21/2015  | HHMI\\negrashovi |
|      | A   | TRANSDUCERS WERE REMOVED |  | 12/10/2015 | HHMI\\negrashovi |
|      | B   | ACRYLIC INSERT           |  | 2/26/2016  | HHMI\\negrashovi |

| 1    | 2   | *Varies*                                                       | -   | COMMON      | DIGIKEY           | THERMAL PAD                            | N/A         | N/A              |
|------|-----|----------------------------------------------------------------|-----|-------------|-------------------|----------------------------------------|-------------|------------------|
| 2    | 1   | CHAMBER COVER GLASS.ipt                                        | -   | J001843     | HHMI: JFRC - ID&F | CHAMBER COVER GLASS                    | N/A         | N/A              |
| 3    | 1   | NEW PCB.ipt                                                    | -   | J002287     | HHMI: JFRC - ID&F | TWO COLORS BACKLIGHT                   | N/A         | N/A              |
| 4    | 1   | CLAMPS MOUNT.ipt                                               | -   | J002445     | HHMI: JFRC - ID&F | CHAMBER SPACER                         | N/A         | N/A              |
| 5    | 1   | CHAMBER SPACER.ipt                                             | A   | J002446     | HHMI: JFRC - ID&F | CHAMBER SPACER                         | N/A         | N/A              |
| 6    | 1   | CHAMBER BOTTOM.ipt                                             | -   | J002447     | HHMI: JFRC - ID&F | CHAMBER BOTTOM GLASS                   | N/A         | N/A              |
| 7    | 1   | ARENA SUPPORT.ipt                                              | B   | J002448     | HHMI: JFRC - ID&F | ARENA SUPPORT                          | N/A         | N/A              |
| 8    | 1   | PCB SUPPORT.ipt                                                | C   | J002449     | HHMI: JFRC - ID&F | PCB SUPPORT                            | N/A         | N/A              |
| 9    | 1   | AAVID THERMALLOY_60140_HEAT SINK EXTRUSION.ipt                 | -   | J002450     | HHMI: JFRC - ID&F | HEAT SINK EXTRUSION ALTERED            | 60140       | AAVID THERMALLOY |
| 10   | 1   | VACUUM FITTING.ipt                                             | -   | J002451     | HHMI: JFRC - ID&F | VACUUM FITTING                         | N/A         | N/A              |
| 11   | 1   | LIGHT SEPARATOR.ipt                                            | -   | J005342     | HHMI: JFRC - ID&F | LIGHT SEPARATOR                        | N/A         | N/A              |
| 12   | 4   | MCMMASTER_9452K14_O-RING DASH N 006.ipt                        | -   | 1163N104    | MCMMASTER         | VITON CLEAN ROOM O-RING DASH # 006     | N/A         | N/A              |
| 13   | 4   | MCMMASTER_5004A820_TOGGL E CLAMP.ipt                           | -   | 5004A11     | MCMMASTER         | TOGGLE CLAMP                           | N/A         | N/A              |
| 14   | 4   | BARBED ADAPTER.ipt                                             | -   | FITM328     | NRESEARCH         | BARBED ADAPTER 1/16 TUBE ID            | N/A         | N/A              |
| 15   | 4   | MCMMASTER_92313A542_CUP POINT SET SCREW 1%4-20 LENGTH 1 IN.ipt | -   | 92313A542   | MCMMASTER         | CUP POINT SET SCREW 1/4-20 LENGTH 1 IN | N/A         | N/A              |
| 16   | 4   | THORLABS_RS2P_Ø1 IN x 2 IN OPTICAL POST.ipt                    | -   | RS2P        | THORLABS          | Ø1 IN x 2 IN OPTICAL POST              | N/A         | N/A              |
| 17   | 4   | THORLABS_TR3_Ø0.5 IN x 3 IN OPTICAL POST.ipt                   | -   | TR3         | THORLABS          | Ø0.5 IN x 3 IN OPTICAL POST            | N/A         | N/A              |
| 18   | 1   | RING.ipt                                                       | -   | J005536     | HHMI: JFRC - ID&F | RING FOR ROUND INSERT                  | N/A         | N/A              |
| 19   | 4   | SUPPORT.ipt                                                    | -   | J005537     | HHMI: JFRC - ID&F | SUPPORT FOR ROUND INSERT               | N/A         | N/A              |
| ITEM | QTY | FILE NAME                                                      | REV | PART NUMBER | VENDOR            | DESCRIPTION                            | A.I. PART # | A.I. VENDOR      |

NOTICE:  
INFORMATION CONTAINED IN THIS DOCUMENT OR ANY REPRODUCTION THEREOF, IS PROPRIETARY INFORMATION AND PROPERTY OF HOWARD HUGHES MEDICAL INSTITUTE. IT SHALL NOT BE DISCLOSED, COPIED, DUPLICATED OR USED FOR MANUFACTURE, PRODUCTION OR PROCUREMENT, WITHOUT THE EXPRESS WRITTEN PERMISSION OF HOWARD HUGHES MEDICAL INSTITUTE.

(UNLESS SPECIFIED OTHERWISE)  
PRIMARY UNITS: INCHES  
[SECONDARY UNITS]: MILLIMETERS  
PRIMARY TOLERANCES:  
X.X ± 0.020  
X.XX ± 0.010  
X.XXX ± 0.005  
X.XXXX ± 0.0005  
ANGULAR ± 0.5 DEG  
- DO NOT SCALE DRAWING -  
THIRD ANGLE PROJECTION:



Howard Hughes Medical Institute



janelia Research Campus

OLFACTORY ASSAY ARENA.iam

|           |                        |          |                 |
|-----------|------------------------|----------|-----------------|
| SIZE<br>C | PART NUMBER<br>J005341 | REV<br>B | SHEET<br>1 OF 2 |
|-----------|------------------------|----------|-----------------|

3D VIEW. CLICK AND DRAG WITH LEFT BUTTON OF MOUSE

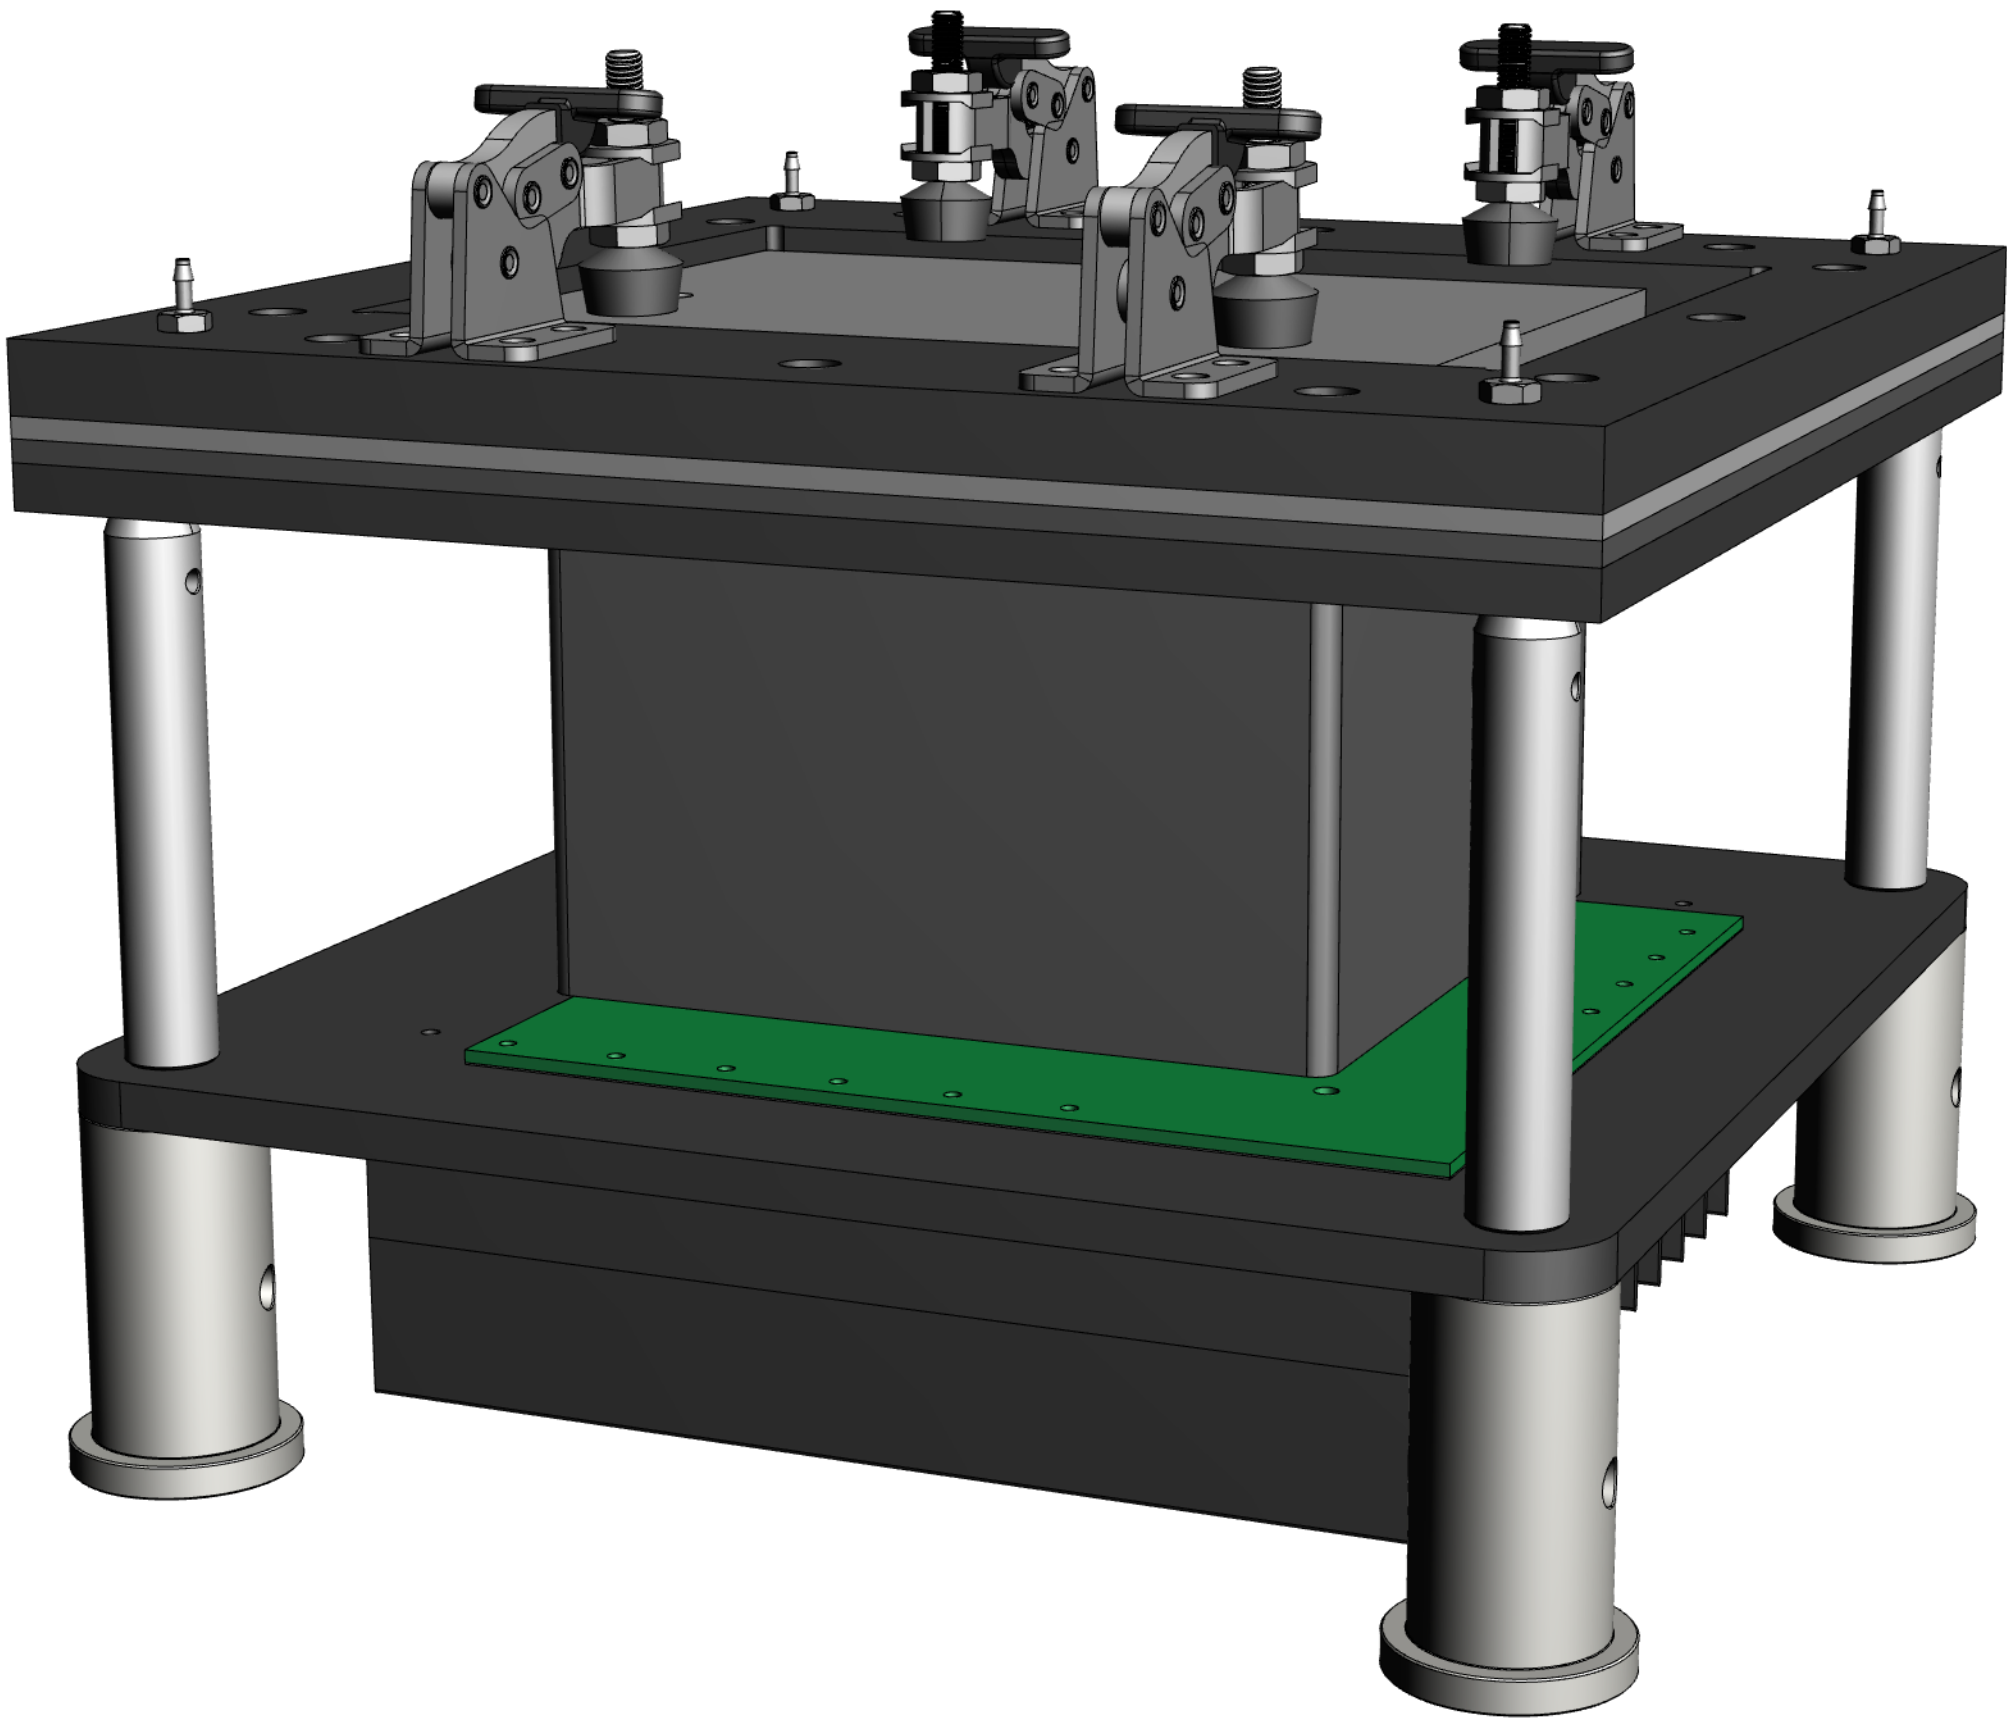

NOTICE:  
INFORMATION CONTAINED IN THIS  
DOCUMENT OR ANY REPRODUCTION  
THEREOF, IS PROPRIETARY  
INFORMATION AND PROPERTY OF  
HOWARD HUGHES MEDICAL INSTITUTE.  
IT SHALL NOT BE DISCLOSED, COPIED,  
DUPLICATED OR USED FOR  
MANUFACTURE, PRODUCTION OR  
PROCUREMENT, WITHOUT THE EXPRESS  
WRITTEN PERMISSION OF HOWARD  
HUGHES MEDICAL INSTITUTE.

(UNLESS SPECIFIED OTHERWISE)  
PRIMARY UNITS: INCHES  
[SECONDARY UNITS]: MILLIMETERS  
PRIMARY TOLERANCES:  
X.X ± 0.020  
X.XX ± 0.010  
X.XXX ± 0.005  
X.XXXX ± 0.0005  
ANGULAR ± 0.5 DEG  
- DO NOT SCALE DRAWING -  
THIRD ANGLE PROJECTION:

|                                                                                                                          |                                                                                                                         |     |                 |
|--------------------------------------------------------------------------------------------------------------------------|-------------------------------------------------------------------------------------------------------------------------|-----|-----------------|
|  Howard Hughes<br>Medical Institute |  <b>janelia</b><br>Research Campus |     |                 |
| SIZE<br>C                                                                                                                | PART NUMBER                                                                                                             | REV | SHEET<br>2 OF 2 |
