# Supplementary figures and images for: Dopaminergic neurons write and update memories with cell-type-specific rules
Source: eLife journal article supplement (doi:10.7554/elife.16135), 2016-07-21

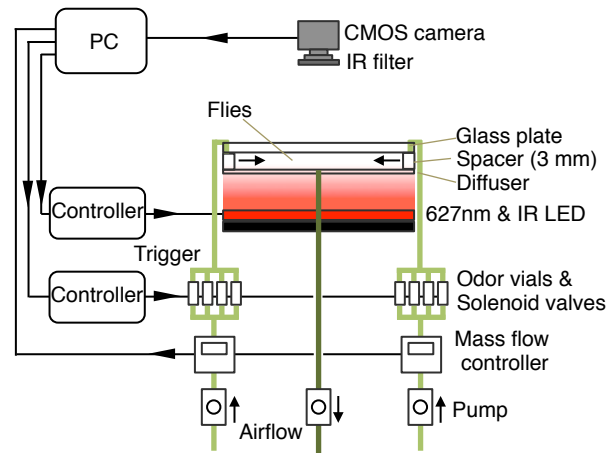

**Figure 1-figure supplement 1**

Supplement: supp [file elife_poa_e16135_Figure_1_figure_supplement_1.pdf › elife_poa_e16135_Figure_1_figure_supplement_1.pdf]

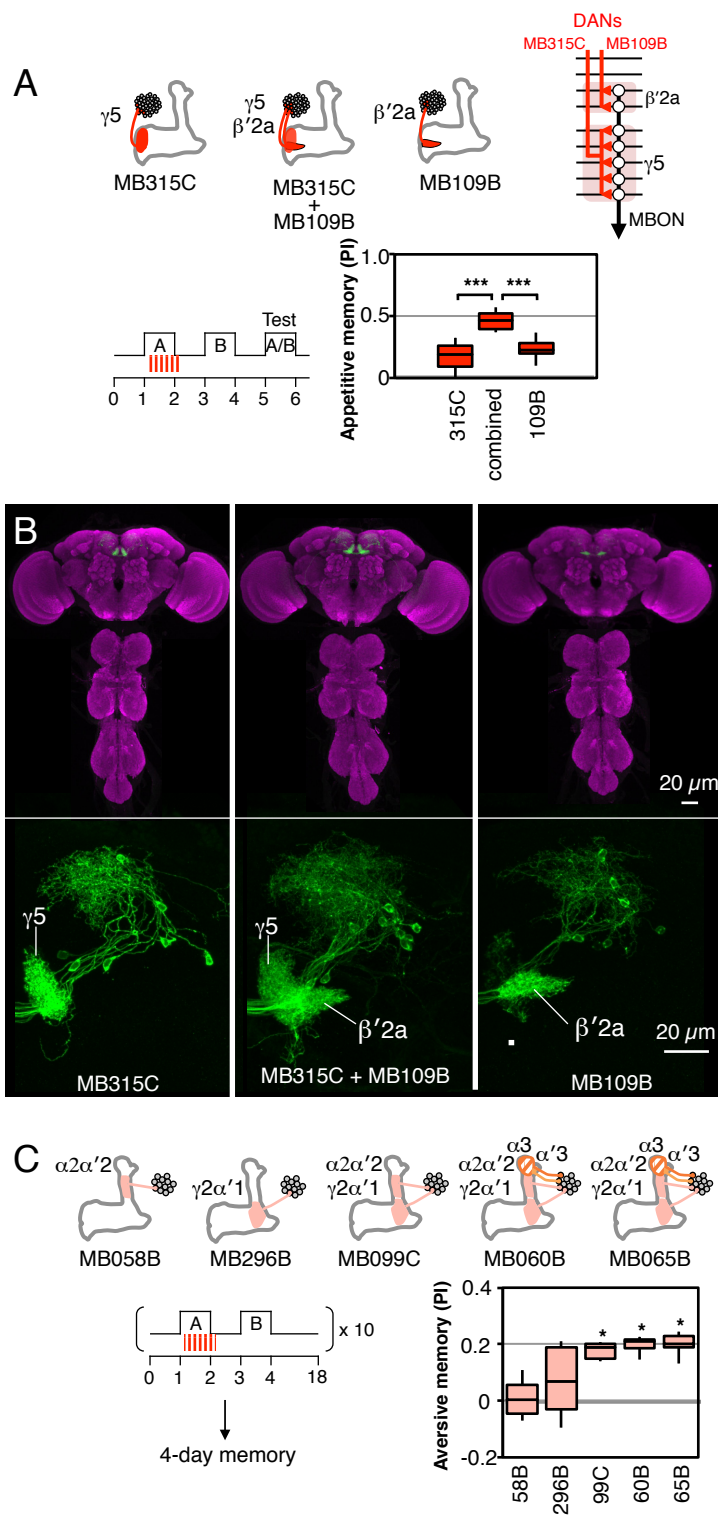

**Figure 2-figure supplement 1**

Supplement: supp [file elife_poa_e16135_Figure_2_figure_supplement_1.pdf › elife_poa_e16135_Figure_2_figure_supplement_1.pdf]

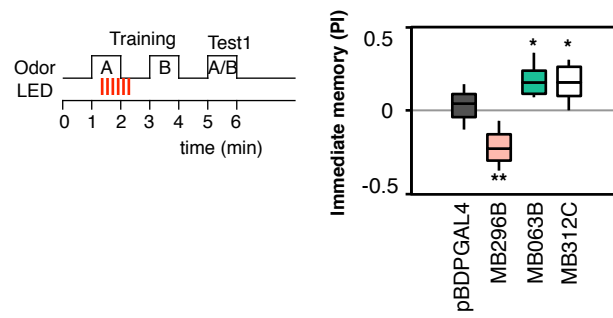

**Figure 2-figure supplement 2**

Supplement: supp [file elife_poa_e16135_Figure_2_figure_supplement_2.pdf › elife_poa_e16135_Figure_2_figure_supplement_2.pdf]

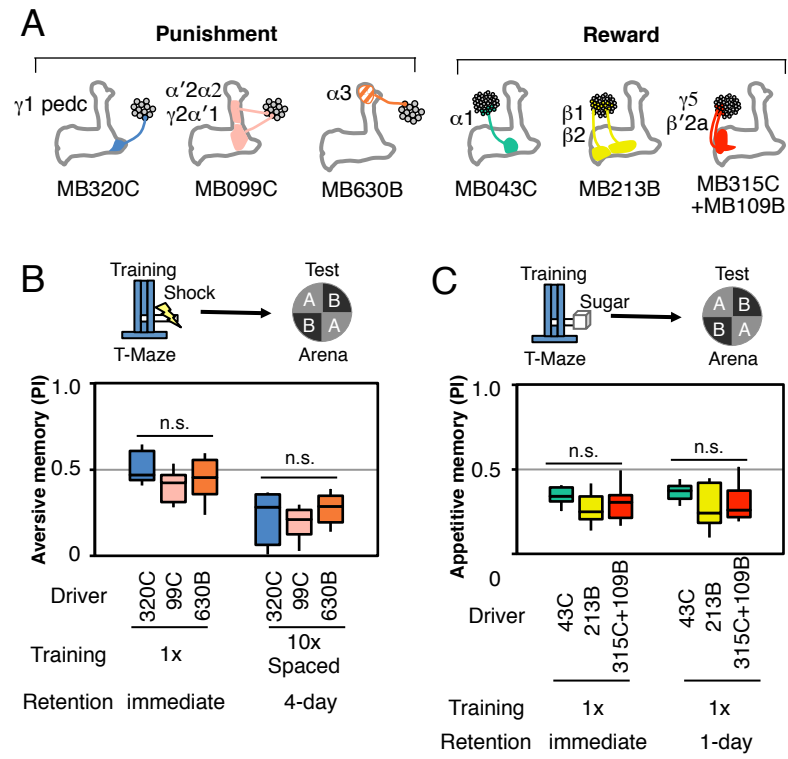

**Figure 2-figure supplement 3**

Supplement: supp [file elife_poa_e16135_Figure_2_figure_supplement_3.pdf › elife_poa_e16135_Figure_2_figure_supplement_3.pdf]

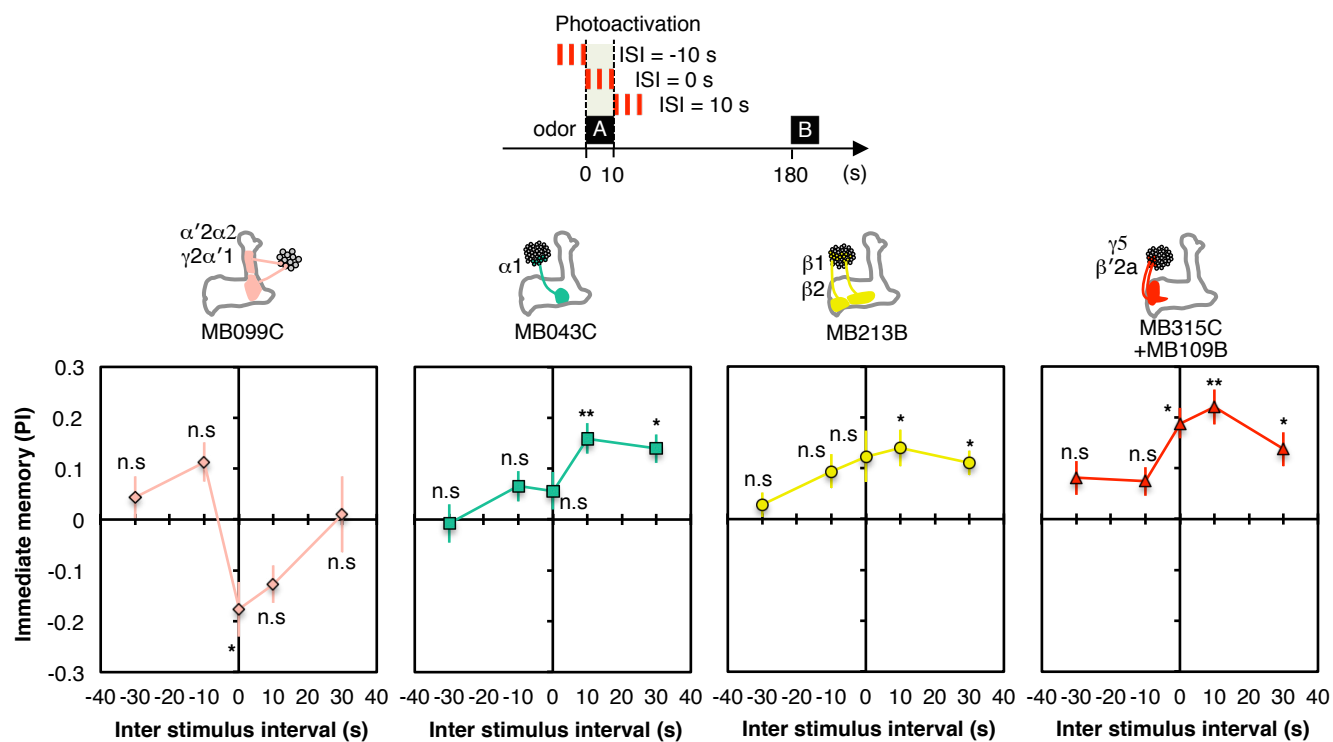

Figure 2-figure supplement 4

Supplement: supp [file elife_poa_e16135_Figure_2_figure_supplement_4.pdf › elife_poa_e16135_Figure_2_figure_supplement_4.pdf]

Amount of memory retained after time  $t = I \times e^{-t/S}$

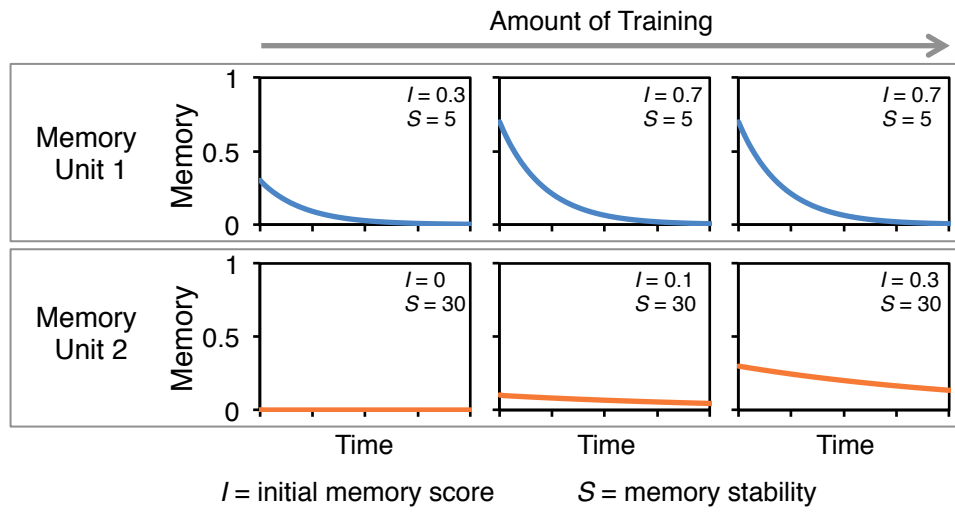

**Figure 2-figure supplement 5**

Supplement: supp [file elife_poa_e16135_Figure_2_figure_supplement_5.pdf › elife_poa_e16135_Figure_2_figure_supplement_5.pdf]

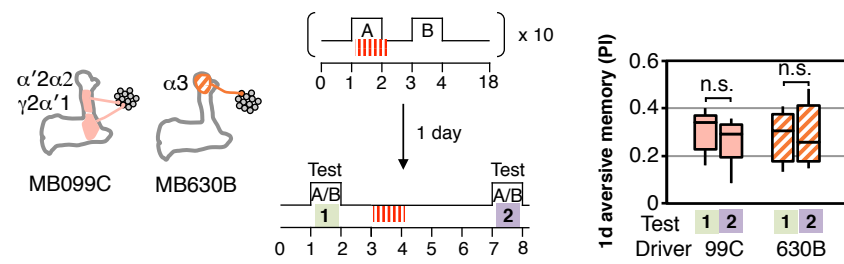

**Figure 3–figure supplement 1**

Supplement: supp [file elife_poa_e16135_Figure_3_figure_supplement_1.pdf › elife_poa_e16135_Figure_3_figure_supplement_1.pdf]
